# Supplementary material for: Characterization of a Metamorphosed Volcanic Stratigraphy and VMS Alteration Halos Using Rock Chip Petrography and Lithogeochemistry: A Case Study from King North, Yilgarn Craton, Western Australia
Source: MDPI journal article supplement (doi:10.3390/min14050481), 2024-04-30
Supplement: s1 [file s1]

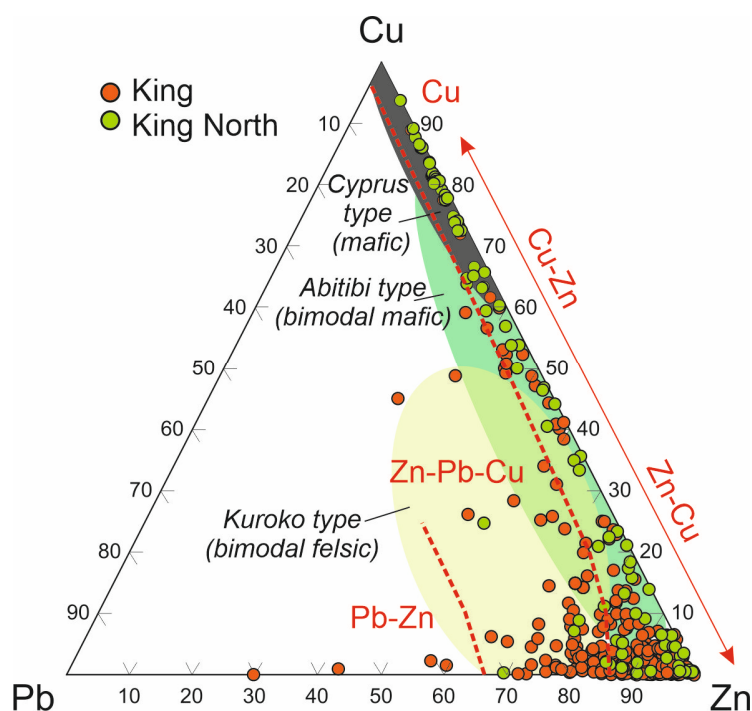

**Supplementary Figure S1.** Base metal classification scheme for VMS deposits after [38–40], with the fields for Cyprus-, Abitibi- and Kuroko-type deposits of the Urals from [41]. Samples of massive sulfide from King are shown along with significant intercepts of mineralization at King North.

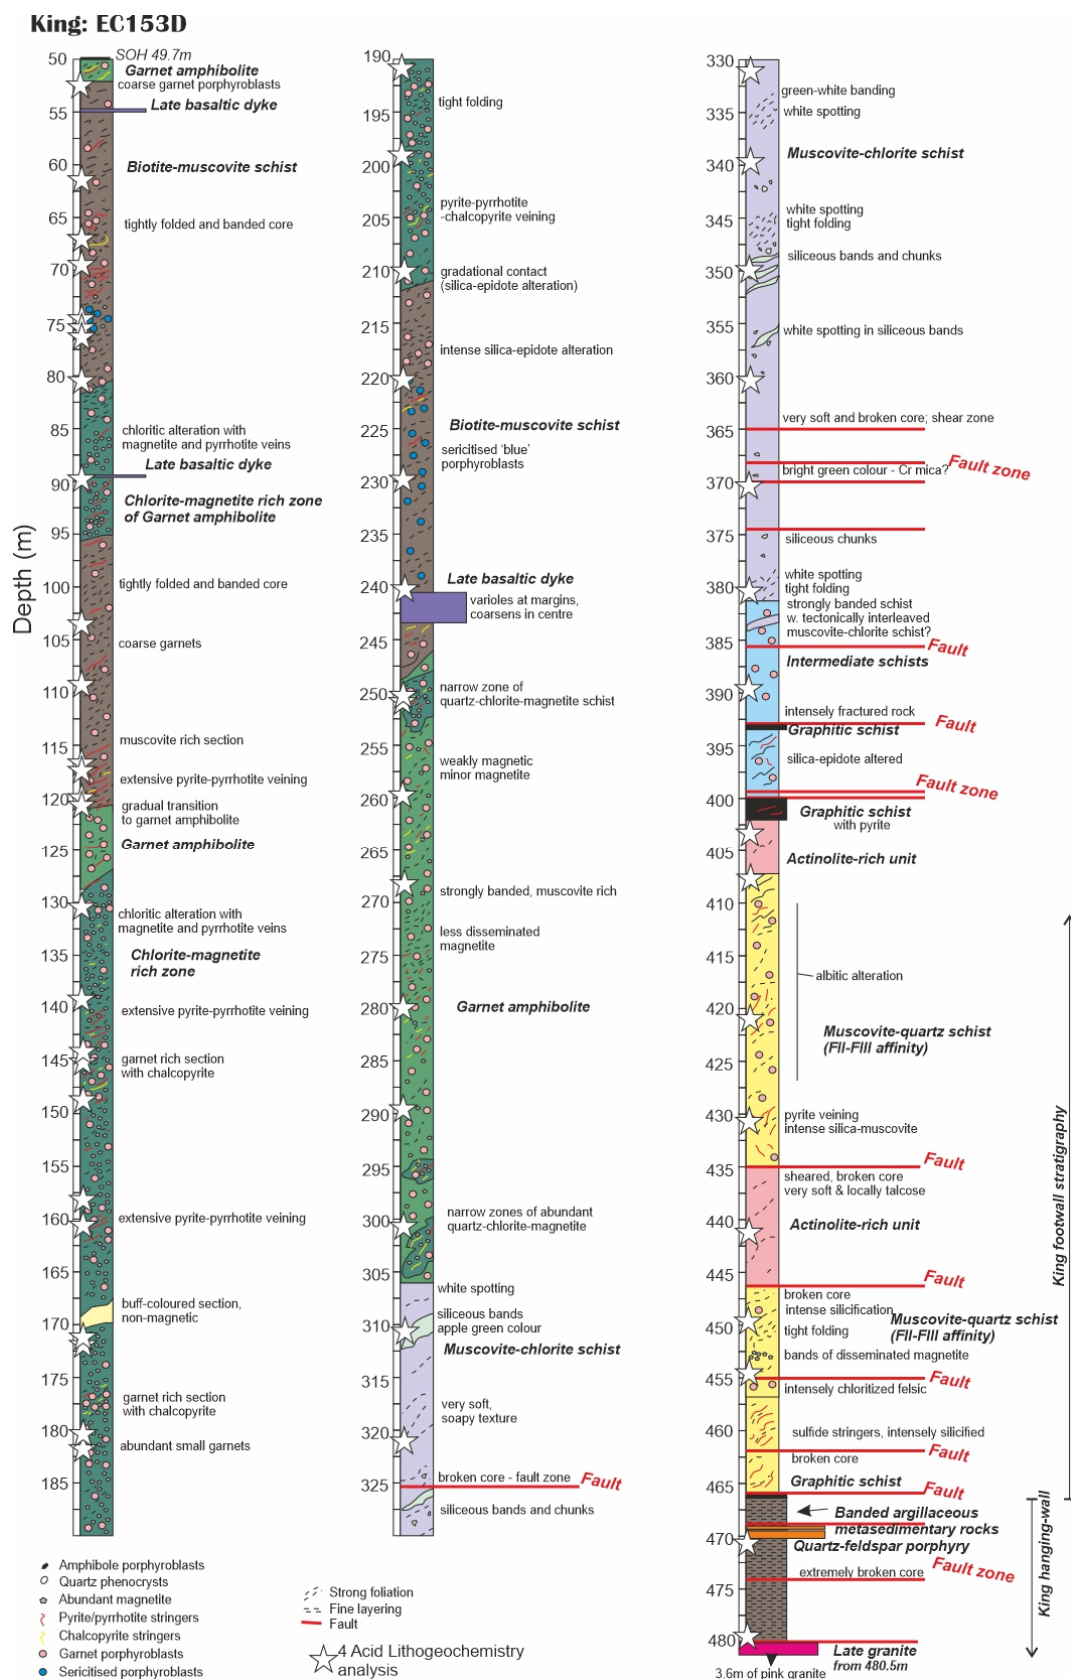

**Supplementary Figure S2.** Summary geological log of diamond drillhole EC153D through the King footwall stratigraphy. See Figure 10d for the location of this hole.

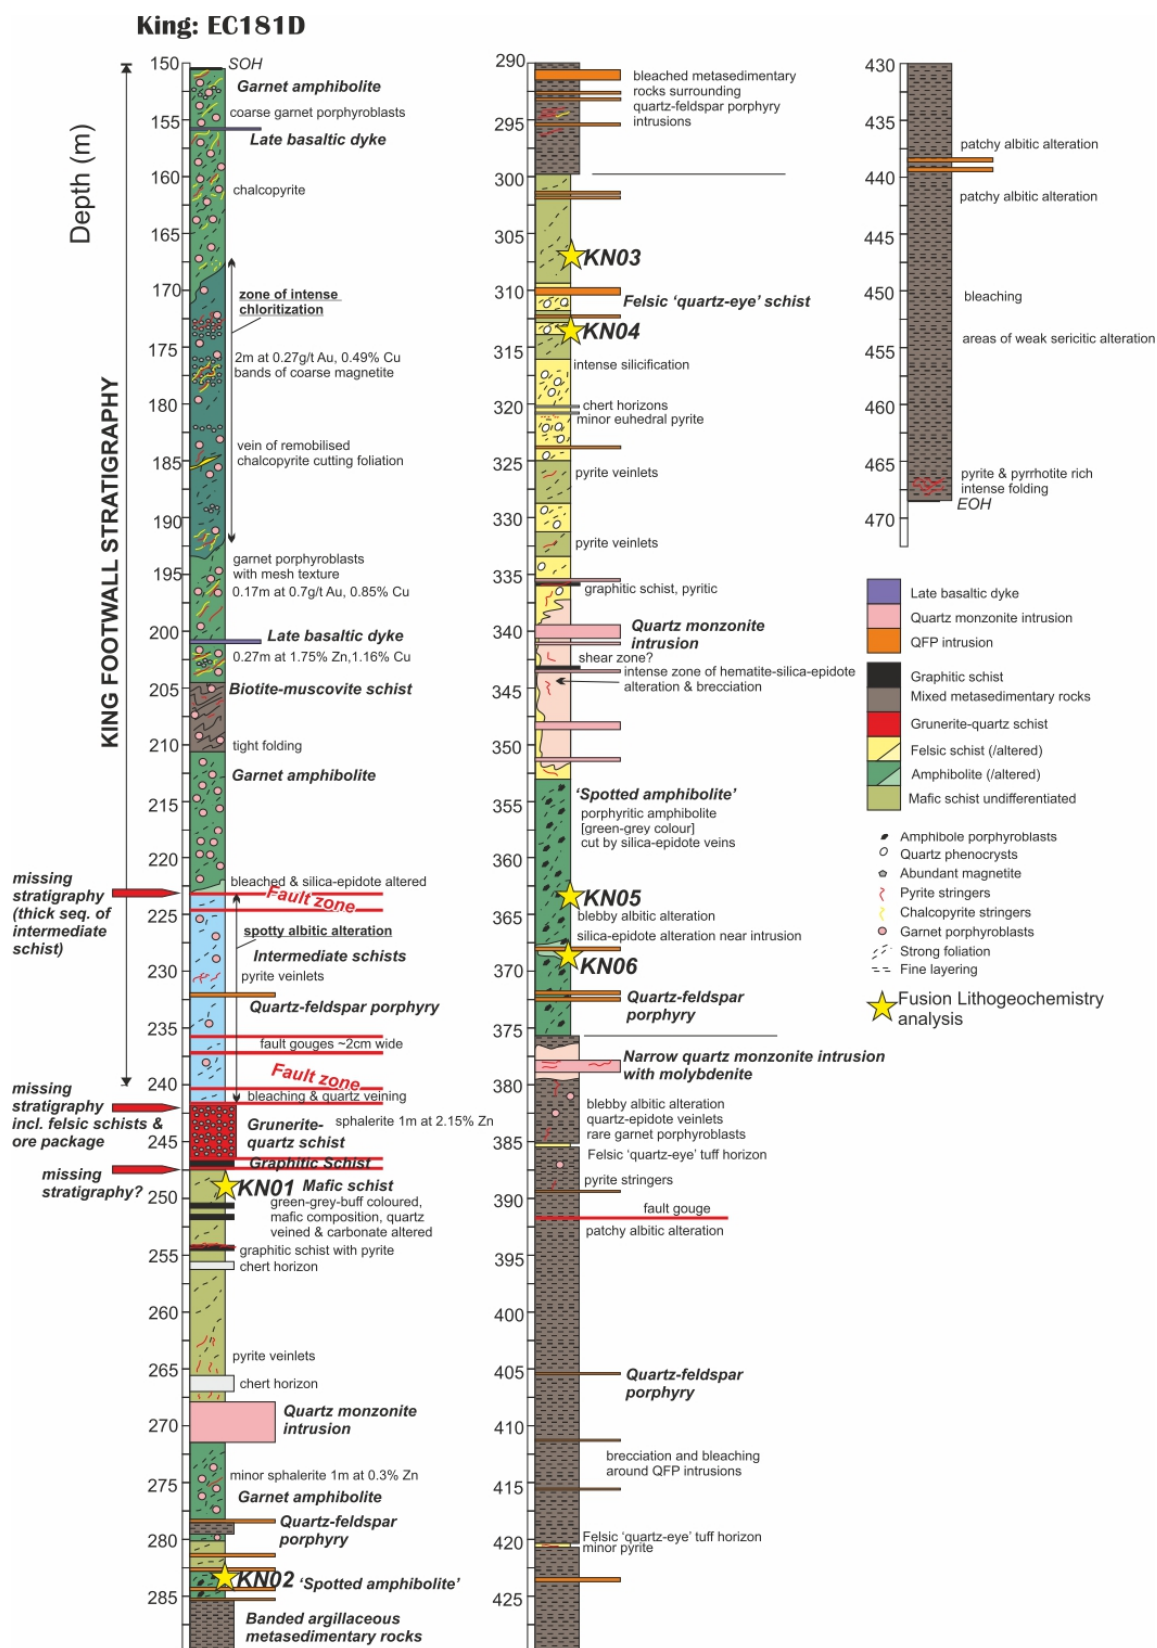

**Supplementary Figure S3.** Summary geological log of diamond drillhole EC181D through the King hanging-wall stratigraphy. Much of the stratigraphic footwall has been removed by the King Fault or an adjacent splay. See **Figure 10d** for the location of this hole.

**Supplementary Table S1.** Whole rock geochemical data from King North and King.

Excel file attached.

**Supplementary Table S2.** XRD results of rock chips analysed from RC drillholes.

| Drillhole | Depth  | Lithology                         | Affinity     | Quartz<br>% | Chlorite<br>% | Muscovite<br>% | Albite<br>% | Amphibole<br>% | Epidote<br>% |
|-----------|--------|-----------------------------------|--------------|-------------|---------------|----------------|-------------|----------------|--------------|
| EC164     | 23-24m | Chlorite-quartz schist            | Felsic       | 76          | 20            | 4              |             |                |              |
| EC164     | 38-39m | Chlorite-quartz schist            | Felsic       | 90          | 9             | 1              |             |                |              |
| EC164     | 40-41m | Chlorite-quartz schist            | Felsic       | 80          | 14            | 6              |             |                |              |
| EC164     | 52-53m | Chlorite-quartz schist            | Felsic       | 81          | 12            | 5              | 2           |                |              |
| EC164     | 54-55m | Chlorite-quartz schist            | Felsic       | 73          | 8             | 7              | 12          |                |              |
| EC164     | 60-61m | Chlorite-quartz schist            | Felsic       | 73          | 19            | 7              | 1           |                |              |
| EC164     | 63-64m | Chlorite-quartz schist            | Felsic       | 62          | 27            | 10             | 1           |                |              |
| EC164     | 72-73m | Amphibole-quartz-albite schist    | Intermediate | 27          | 10            | 2              | 42          | 19             |              |
| EC164     | 74-75m | Amphibole-quartz-albite schist    | Intermediate | 41          | 21            |                | 24          |                | 14           |
| EC164     | 79-80m | Amphibole-quartz-albite schist    | Intermediate | 20          | 13            | 1              | 49          | 17             |              |
| EC175     | 48-49m | Chlorite-actinolite-quartz schist | -            | 16          | 27            | 10             | 3           |                | 44           |
| EC175     | 60-61m | Hanging-wall amphibolite          | Mafic        | 7           | 27            |                | 34          | 32             |              |
| EC175     | 63-64m | Hanging-wall amphibolite          | Mafic        | 4           | 47            |                | 20          | 29             |              |
| EC175     | 65-66m | Hanging-wall amphibolite          | Mafic        | 3           | 14            |                | 29          | 54             |              |
| EC175     | 68-69m | Hanging-wall amphibolite          | Mafic        | 12          | 5             |                | 21          | 62             |              |
| EC175     | 74-75m | Hanging-wall amphibolite          | Mafic        | 13          | 27            |                | 22          | 38             |              |
| EC175     | 76-77m | Hanging-wall amphibolite          | Mafic        | 13          | 16            |                | 27          | 44             |              |
| EC175     | 81-82m | Hanging-wall amphibolite          | Mafic        | 15          | 3             |                | 19          | 63             |              |
| EC175     | 95-96m | Hanging-wall amphibolite          | Mafic        | 1           | 5             |                | 16          | 80             |              |
| EC175     | 98-99m | Hanging-wall amphibolite          | Mafic        | 37          | 3             |                | 12          | 42             | 6            |
